# Supplementary material for: Targeting lysyl oxidase reduces peritoneal fibrosis
Source: PubMed Central journal article supplement (PMC5553776; doi:10.1371/journal.pone.0183013), 2017-08-11
Supplement: pone.0183013.s007.pdf [file pone.0183013.s007.pdf]

S1 Table

| <b>Construct designation</b> | <b>LOX target Sequence bp</b> | <b>Construct sequence (5'-3')</b>                                                                                                  |
|------------------------------|-------------------------------|------------------------------------------------------------------------------------------------------------------------------------|
| Scrambled Control            | NA                            | <b><i>TGC TGA</i></b> AAT GTA CTG CGC GTG GAG AC <b><i>TTT TGG CCA</i></b><br><b><i>CTG ACT</i></b> GAC GTC TCC ACG CAG TAC ATT T  |
| LOX-224                      | 663 bp^                       | <b><i>TGC TGT</i></b> ACA TAG ACA TCT TCT GGA CGG <b><i>TTT TGG CCA</i></b><br><b><i>CTG ACT</i></b> GAC CGT CCA GAA TGT CTA TGT A |
| LOX-225*                     | 1017 bp                       | <b><i>TGC TGT</i></b> AAC ATC CAG GAC TCA ATC CCG <b><i>TTT TGG CCA</i></b><br><b><i>CTG ACT</i></b> GAC GGG ATT GAC CTG GAT GTT A |
| LOX-226                      | 249 bp                        | <b><i>TGC TGT</i></b> CAC GCA GCA GAA GAA TGG GCG <b><i>TTT TGG CCA</i></b><br><b><i>CTG ACT</i></b> GAC GCC CAT TCC TGC TGC CTG A |
| LOX-227                      | 1205 bp                       | <b><i>TGC TGA</i></b> AAT TGT GCA GCC TGA GGC ATG <b><i>TTT TGG CCA</i></b><br><b><i>CTG ACT</i></b> GAC ATG CCT CAC TGC ACA ATT T |
| LOX-631                      | 252 bp                        | <b><i>TGC TGT</i></b> TGT CAC GCA GCA GAA GAA TGG <b><i>TTT TGG CCA</i></b><br><b><i>CTG ACT</i></b> GAC CAT TCT TCC TGC GTG ACA A |
| LOX-1396*                    | 1017 bp                       | <b><i>TGC TGT</i></b> AAC ATC CAG GAC TCA ATC CCG <b><i>TTT TGG CCA</i></b><br><b><i>CTG ACT</i></b> GAC GGG ATT GAC CTG GAT GTT A |
