# Supplementary material for: Targeting lysyl oxidase reduces peritoneal fibrosis
Source: PubMed Central journal article supplement (PMC5553776; doi:10.1371/journal.pone.0183013), 2017-08-11
Supplement: pone.0183013.s008.pdf [file pone.0183013.s008.pdf]

S2 Table

| Gene name                | Code          | Interrogated sequence          | Exon boundary | Assay location | Amplicon length (bp) |
|--------------------------|---------------|--------------------------------|---------------|----------------|----------------------|
| Lysyl oxidase            | Mm01265612_m1 | <a href="#">NM_001286181.1</a> | 6-7           | 1340           | 71                   |
| Colla1                   | Mm00801666_g1 | <a href="#">NM_007742.3</a>    | 49-50         | 4071           | 89                   |
| Col3a1                   | Mm01254476_m1 | <a href="#">NM_009930.2</a>    | 50-51         | 4460           | 136                  |
| Procollagen c-proteinase | Mm00802220_m1 | <a href="#">NM_009755.3</a>    | 2-3           | 503            | 52                   |
